# Supplementary material for: On the nature of niobium substitution in niobium doped titania thin films by AACVD and its impact on electrical and optical properties
Source: Royal Society of Chemistry journal article supplement (doi:10.1039/c5ta03772g), 2015-01-01
Supplement: c5ta03772g1.pdf [file c5ta03772g1.pdf]

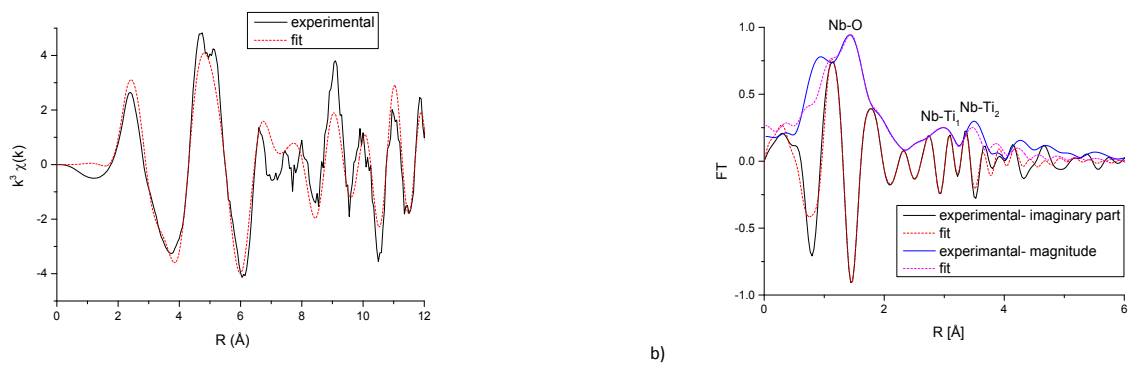

Figure 1. Nb K-edge EXAFS of  $\text{Ti}_{0.77}\text{Nb}_{0.23}\text{O}_2$  thin film a) plot showing the  $k^3\chi(k)$  b) plot showing the magnitude and imaginary part of the Fourier transform of the Nb K-edge EXAFS data of the  $\text{Ti}_{0.77}\text{Nb}_{0.23}\text{O}_2$  thin film.

Table 1. Results of Nb K-edge EXAFS analysis. R-factor for  $\text{Ti}_{0.77}\text{Nb}_{0.23}\text{O}_2 = 0.0069$ .

| Sample                                       | Nb O  |   |                | Nb Ti <sub>1</sub> |   |                | Nb Ti <sub>2</sub> |   |                |
|----------------------------------------------|-------|---|----------------|--------------------|---|----------------|--------------------|---|----------------|
|                                              | R [Å] | N | $\sigma^2$ [Å] | R [Å]              | N | $\sigma^2$ [Å] | R [Å]              | N | $\sigma^2$ [Å] |
| $\text{Ti}_{0.77}\text{Nb}_{0.23}\text{O}_2$ | 1.97  | 2 | 0.01           | 3.10               | 4 | 0.01           | 3.77               | 4 | 0.008          |
